# Supplementary material
Source: publisher figshare collection journal article supplement (https://geolsoc.figshare.com/ndownloader/files/26142929)
Supplement: Supplementary file 1 [file 26142929]

## Sheet: Pyroxene
Representative mineral composition data for the pyroxenes from the studied syenites
	AP/DVS/1	AP/DVS/1	AP/DVS/1	AP/DVS/1	AP/DVS/1	AP/DVS/2	AP/DVS/2	AP/DVS/2	AP/DVS/2	AP/DVS/2	AP/DVS/2	AP/DVS/2	AP/DVS/2	AP/DVS/2	AP/DVS/3	AP/DVS/3	AP/DVS/3	AP/DVS/3	AP/DVS/3	AP/DVS/3	AP/DVS/3	AP/DVS/3	AP/DVS/3
SiO2	52.4577	51.9255	52.1845	51.977	52.293	51.6121	50.6026	51.632	51.8303	51.8559	51.011	51.8493	51.8036	51.4864	52.8181	53.1891	52.2488	52.1425	51.7202	51.8977	53.195	52.3127	51.4023
TiO2	0.0945	0.1556	0.0858	0.1331	0.1356	0.2186	0.2242	0.1371	0.1445	0.0865	0.1278	0.1769	0.1876	0.2217	0.0381	0.0356	0.0589	0.0201	na*	na*	na*	0.011	na*
Al2O3	1.1554	1.6533	1.1866	1.1654	1.1628	1.911	1.7038	1.4568	1.4633	1.3635	1.6877	1.5133	1.4639	1.5574	na*	na*	na*	na*	0.0661	0.0502	0.1302	0.0704	0.1228
Cr2O3	na*	0.0648	0.0382	0.0911	0.0776	0.1656	0.0127	na*	na*	na*	0.0455	na*	0.0559	na*	0.0633	0	0.063	0.0496	0.1129	0.0378	0.063	0.0505	na*
FeO	14.9614	14.813	15.9115	15.5724	15.8745	16.3169	17.231	15.32	14.7692	15.0195	16.7691	15.5458	14.9645	15.3841	9.6749	9.3475	9.4997	11.3829	10.7196	12.226	9.4815	10.6734	11.6395
MnO	0.373	0.4651	0.6073	0.3931	0.4398	0.4282	0.2773	0.326	0.4645	0.3997	0.4274	0.4159	0.3725	0.369	1.1106	1.0752	0.8984	1.0928	1.072	0.8809	0.7024	1.3977	0.9566
MgO	9.0579	8.7472	8.5405	8.5459	8.655	7.8437	7.557	8.6371	8.7086	8.6264	7.6237	8.6173	8.6815	8.1105	12.13	12.4441	12.043	10.9524	10.9754	10.296	12.5536	11.2312	10.6151
CaO	18.1679	18.5814	17.8786	17.9432	17.7874	17.7838	18.1981	19.076	19.1825	19.3538	18.3477	19.0271	18.963	18.7998	23.558	23.2922	23.494	23.4364	23.7272	23.5138	22.8804	23.5852	23.4316
Na2O	3.2086	2.974	3.3984	3.3004	3.4143	3.5265	3.3261	3.015	2.9028	2.909	3.1912	3.0061	3.05	3.3193	0.2554	0.7494	0.3884	0.4632	0.5749	0.4462	0.9163	0.5349	0.757
K2O	0.0678	na*	na*	0.0169	na*	0.0141	na*	0.0086	na*	na*	na*	na*	na*	0.0052	0.0286	0.0234	0.0151	0.0202	na*	na*	na*	na*	0.0072
Total	99.5441	99.3799	99.8314	99.1385	99.8438	99.8205	99.1328	99.6086	99.4657	99.6143	99.2311	100.152	99.5425	99.2534	99.677	100.156	98.7093	99.5601	98.9683	99.3486	99.9224	99.867	98.9321
Formula based on 4 cations and 6 oxygen atoms
Si	1.9797	1.96808	1.96975	1.97518	1.97236	1.95192	1.9343	1.95377	1.96386	1.96313	1.94838	1.95333	1.96015	1.95508	1.99726	1.98966	1.99151	1.98637	1.97678	1.98915	1.98999	1.98153	1.96765
Ti	0.00268234	0.00443571	0.00243585	0.00380422	0.00384675	0.00621803	0.00644581	0.00390197	0.00411801	0.00246297	0.00367141	0.00501248	0.00533891	0.00633183	0.0010836	0.00100161	0.00168855	0.000575913	-	-	-	0.000313385	-
Al	0.0513869	0.0738488	0.0527843	0.0521916	0.0516866	0.0851729	0.0767536	0.0649657	0.0653418	0.0608325	0.0759689	0.0671874	0.0652784	0.0696951	-	-	-	-	0.00297735	0.00226753	0.00574011	0.00314265	0.00553979
Cr	-	0.0019417	0.00113993	0.0027369	0.00231392	0.00495126	-	-	-	-	0.00137394	-	0.00167219	-	0.00189235	-	0.00189841	0.00149381	0.00341144	0.0011454	0.00186322	0.00151227	-
Fe3+	0.221868	0.197711	0.250381	0.231072	0.243248	0.252838	0.287864	0.241291	0.211926	0.221488	0.254854	0.235681	0.225818	0.252094	0.0215176	0.0741353	0.0411447	0.0597993	0.0826445	0.0514397	0.0788791	0.0709412	0.115691
Fe2+	0.250266	0.27176	0.251828	0.263756	0.257415	0.263165	0.262898	0.243457	0.256012	0.253966	0.280725	0.25404	0.247654	0.236387	0.284398	0.21825	0.261629	0.302798	0.25995	0.340399	0.217713	0.267123	0.256874
Mn	0.0119217	0.0149296	0.0194139	0.0126514	0.0140487	0.013715	0.00897716	0.0104475	0.0149057	0.0128151	0.0138256	0.0132697	0.0119369	0.0118669	0.0355671	0.0340632	0.0290011	0.0352572	0.0347002	0.0285947	0.0222537	0.044838	0.0310123
Mg	0.509615	0.49426	0.480595	0.484148	0.48667	0.442239	0.43065	0.487244	0.491927	0.486861	0.434111	0.483982	0.48972	0.459139	0.683814	0.693977	0.684329	0.622018	0.62538	0.588319	0.70012	0.634226	0.605779
Ca	0.734542	0.754505	0.72298	0.730495	0.718749	0.720539	0.745244	0.773327	0.778673	0.784944	0.750782	0.76794	0.768701	0.764798	0.954361	0.933446	0.959366	0.956493	0.971555	0.965527	0.91699	0.957094	0.960924
Na	0.234754	0.21853	0.248687	0.243148	0.249662	0.258561	0.246487	0.221182	0.213232	0.213502	0.236305	0.219556	0.223736	0.244358	0.0187233	0.0543474	0.0287007	0.0342094	0.042599	0.0331557	0.0664546	0.0392802	0.0561784
K	0.00326384	-	-	0.000819202	-	0.000680204	-	-	-	-	-	-	-	-	0.00137952	0.00111656	0.000734161	0.000981588	-	-	-	-	-
Total	4	4	4	4	4	4	4	4	4	4	4	4	4	4	4	4	4	4	4	4	4	4	4
mol% end-members
Aeg	22.1868	19.7711	24.8687	23.1072	24.3248	25.2838	24.6487	22.1182	21.1926	21.3502	23.6305	21.9556	22.3736	24.4358	1.87233	5.43474	2.87007	3.42094	4.2599	3.31557	6.64546	3.92802	5.61784
Jd	1.28865	2.08195	0	1.20756	0.641391	0.57235	0	0	0.130675	0	0	0	0	0	0	0	0	0	0	0	0	0	0
Ti-Aeg	0	0	0	0	0	0	0	0	0	0	0	0	0	0	0	0	0	0	0	0	0	0	0
Fe-Ts	0	0	0.0847065	0	0	0	2.06886	1.00546	0	0.399293	0.927435	0.806276	0.104063	0.386778	0.139718	0.989394	0.622198	1.27949	2.00228	0.914202	0.621222	1.58305	2.97564
Ti-Ts	0.268234	0.443571	0.243585	0.380422	0.384675	0.621803	0.644581	0.390197	0.411801	0.246297	0.367141	0.501248	0.533891	0.633183	0	0	0	0	0	0	0	0.0313385	0
Al-Ts	1.4936	2.11081	2.25393	1.52949	1.76326	3.13712	1.10505	1.87338	2.78995	2.39604	2.43517	2.05185	2.54236	2.47739	0	0	0	0	0	0	0	0	0
Di	47.3379	46.1357	44.5642	45.2854	44.7599	41.9996	43.065	48.6908	48.1487	48.6861	42.5069	47.3066	48.1607	45.9139	64.9197	67.7302	66.9017	61.1409	62.538	58.7749	67.8293	63.0716	60.5779
Hd	24.3545	26.7604	25.1515	25.8541	24.967	26.2954	27.1875	25.3729	26.5168	26.6782	28.8416	26.1281	25.529	24.8254	30.3767	24.625	28.4127	33.2289	29.465	36.8636	23.2485	31.0234	28.7887
En	1.81182	1.64516	1.74762	1.56467	1.95355	1.11215	0	0.0168251	0.522009	1.79304e-15	0.452105	0.545804	0.40564	0	1.73088	0.833768	0.765617	0.530485	0	0.0285123	1.09136	0.175514	1.88144e-15
Fs	0.932147	0.954252	0.986336	0.89329	1.08969	0.6963	0	0.00876759	0.287485	9.82519e-16	0.306759	0.301455	0.215022	0	0.809901	0.303138	0.325153	0.288309	0	0.0178829	0.374063	0.0863313	8.94122e-16
*not analysed

## Sheet: Amphibole
Mineral composition data for the amphiboles from the studied syenites
	AP/DVS/1	AP/DVS/1	AP/DVS/1	AP/DVS/2	AP/DVS/2	AP/DVS/2	AP/DVS/3	AP/DVS/3	AP/DVS/3	AP/DVS/3	AP/DVS/3	AP/DVS/3	AP/DVS/3	AP/DVS/3	AP/DVS/3
SiO2	52.925	53.5487	53.8821	54.2491	53.4814	53.8233	53.9255	50.849	53.9402	53.6707	53.3478	53.5551	51.4325	54.5902	54.2952
TiO2	0.1257	0.0694	0.0696	0.052	0.0527	0.0667	0.0818	0.115	0.0254	0.1072	0.0758	0.0861	0.1103	0.0419	0.0441
Al2O3	1.4165	1.3947	1.1355	0.7932	1.2459	0.9058	1.1913	na*	0.2418	0.7826	0.8123	0.5168	0.5227	0.9561	0.7269
Cr2O3	na*	0.0094	na*	0.0738	0.0163	0.0181	na*	0.0252	-0.0007	0.1256	0.0617	0.0361	0.0637	na*	0.064
FeO	14.0935	13.9529	13.4575	12.2214	13.9034	12.9549	13.6701	21.5695	12.2886	14.2009	14.2891	14.4472	15.2052	13.3699	14.7092
MnO	0.722	0.5514	0.368	0.5042	0.5643	0.5528	0.683	0.7542	0.4696	0.6832	0.8685	0.6128	0.7015	0.5274	0.582
MgO	14.8198	14.9479	15.3704	15.7482	15.311	15.5005	14.9369	11.164	16.1759	14.1717	14.9119	14.2336	15.0391	16.2057	14.5778
CaO	9.7228	10.4363	10.2888	10.8604	10.6411	10.6724	10.0124	9.099	10.9097	10.44	10.4322	10.5725	10.5221	10.2579	12.1453
Na2O	2.0896	1.5977	1.6171	1.1154	1.3679	1.2636	1.331	1.5867	0.832	1.2708	1.2671	1.0318	1.0656	1.545	0.4033
K2O	0.6328	0.546	0.4787	0.2772	0.5537	0.3913	0.3545	0.0501	0.2357	0.3646	0.455	0.3768	0.3491	0.346	0.065
Total	96.5477	97.0544	96.6677	95.8949	97.1377	96.1494	96.1865	95.2127	95.1182	95.8173	96.5214	95.4688	95.0118	97.8401	97.6128
Cations for 23 oxygen atoms
Si	7.71512	7.76321	7.8045	7.88809	7.73094	7.82976	7.81805	7.66208	7.87605	7.8969	7.76396	7.90466	7.60568	7.75305	7.86352
Al(IV)	0.243348	0.236793	0.193828	0.111908	0.212248	0.155289	0.181954	0	0.0416085	0.103102	0.13932	0.0898949	0.0910926	0.160026	0.124068
Total T site	7.95847	8	7.99832	8	7.94319	7.98504	8	7.66208	7.91765	8	7.90328	7.99455	7.69678	7.91308	7.98759
Al(VI)	-	0.00149593	-	0.0240144	-	-	0.0215884	-	-	0.0326006	-	-	-	-	-
Ti	0.0137819	0.00756735	0.00758231	0.00568689	0.0057297	0.00729786	0.00891968	0.0130333	0.00278947	0.0118633	0.00829713	0.00955823	0.0122678	0.00447573	0.00480381
Cr	-	0.00107737	-	0.00848361	0.00186278	0.00208162	-	0.00300199	-	0.0146101	0.007099	0.00421245	0.00744706	-	0.00732792
Fe3+	0.553775	0.427229	0.446343	0.318611	0.531249	0.413013	0.592624	1.2359	0.508194	0.309906	0.614011	0.367689	0.960291	0.715307	0.237799
Fe2+	1.16415	1.26422	1.18358	1.16734	1.14931	1.16284	1.06459	1.48184	0.992186	1.43728	1.12489	1.41538	0.919874	0.872469	1.54355
Mn	0.0891369	0.0677014	0.0451426	0.0620899	0.0690841	0.0681059	0.0838617	0.0962476	0.0580714	0.0851346	0.107047	0.0766019	0.0878551	0.0634361	0.0713867
Mg	3.22069	3.23071	3.31902	3.41378	3.29958	3.36162	3.22842	2.50789	3.52119	3.10861	3.23538	3.132	3.31549	3.43124	3.14755
Total C site	5.04153	5	5.00168	5	5.05681	5.01496	5	5.33792	5.08235	5	5.09672	5.00545	5.30322	5.08692	5.01241
Ca	1.51843	1.62092	1.59657	1.69179	1.64793	1.66327	1.55512	1.46886	1.70659	1.64567	1.62654	1.67179	1.66696	1.56077	1.88445
Na	0.481569	0.379083	0.403434	0.308207	0.352073	0.336733	0.374102	0.463519	0.23552	0.354334	0.357508	0.295247	0.305494	0.425397	0.113238
Total B site	2	2	2	2	2	2	1.92922	1.93238	1.94211	2	1.98405	1.96704	1.97245	1.98617	1.99769
Na	0.108976	0.069968	0.0506603	0.00621868	0.0312745	0.0196325	-	-	-	0.00816323	-	-	-	-	-
K	0.117668	0.10097	0.0884449	0.051414	0.102097	0.0726101	0.0655585	0.00962967	0.0439	0.0684297	0.084467	0.0709418	0.0658506	0.062682	0.0120082
Total A site	0.226644	0.170938	0.139105	0.0576327	0.133372	0.0922425	0.0655585	0.00962967	0.0439	0.076593	0.084467	0.0709418	0.0658506	0.062682	0.0120082
	Actinolite	Actinolite	Actinolite	Actinolite	Actinolite	Actinolite	Actinolite	Actinolite	Actinolite	Actinolite	Actinolite	Actinolite	Actinolite	Actinolite	Actinolite
*not analysed

## Sheet: Feldspar
Representative mineral composition data for the feldspar from the studied syenites
	SS/PVS/1	SS/PVS/1	SS/PVS/1	SS/PVS/2	SS/PVS/2	SS/PVS/2	AP/DVS/1	AP/DVS/1	AP/DVS/1	AP/DVS/1	AP/DVS/2	AP/DVS/2	AP/DVS/3	AP/DVS/3	AP/VDS/1	AP/VDS/1	AP/VDS/1	AP/VDS/1	AP/VDS/1	AP/VDS/1
SiO2	64.4861	68.9822	67.7229	64.7929	65.0247	64.9862	64.4017	68.4375	64.3079	68.0338	68.4965	68.4971	69.6621	68.303	68.6606	64.7004	64.4811	65.2989	63.9411	64.7429
Al2O3	18.5548	19.8552	19.0629	18.6841	18.8713	18.7473	19.0128	20.313	18.7513	20.4875	20.2155	19.7239	19.9662	19.8301	18.6584	17.0405	16.8159	17.5243	17.2643	17.0523
FeO	0.1829	na*	na*	na*	na*	na*	na*	na*	na*	na*	na*	0.2748	0.3231	0.1092	na*	na*	na*	na*	0.0773	0.0128
CaO	0.0274	na*	na*	na*	na*	na*	na*	na*	na*	na*	na*	na*	0.0131	na*	0.0689	na*	na*	0.0778	na*	na*
Na2O	0.2499	10.9717	12.2968	0.3359	0.186	0.1612	0.4707	11.8679	0.599	11.6425	11.9038	11.931	10.8346	12.2219	12.1715	0.2452	0.2637	0.2073	0.2619	0.2093
K2O	15.4311	0.0821	0.0608	15.1992	15.4633	15.4027	15.4964	0.0366	15.2204	0.0332	0.038	0.0186	0.0603	0.0333	na*	17.549	17.4567	17.122	17.3431	16.7342
BaO	0.6119	na*	na*	na*	na*	na*	0.2361	na*	0.2205	na*	na*	na*	0.0309	na*	na*	na*	na*	na*	na*	na*
Total	99.5441	99.8912	99.1452	99.0121	99.5453	99.2974	99.6177	100.655	99.0991	100.197	100.654	100.445	100.89	100.498	99.5597	99.5351	99.0174	100.23	98.8877	98.7515
Cations for 32 oxygen atoms
Si	11.978	12.0132	11.9663	12.0102	11.9964	12.0141	11.9231	11.8821	11.9547	11.8583	11.8936	11.9341	12.02	11.9033	12.0605	12.1109	12.1321	12.0937	12.0515	12.15
Al	4.06167	4.07499	3.96956	4.08155	4.10301	4.0845	4.14828	4.15627	4.10804	4.2084	4.13674	4.04985	4.06006	4.07271	3.86243	3.75908	3.72866	3.82494	3.83478	3.77135
Fe2+	0.0284077	-	-	-	-	-	-	-	-	-	-	0.0400347	0.0466173	0.0159131	4.40637e-05	-	-	-	0.0121827	0.00200861
Ca	0.00545244	-	-	-	-	-	-	-	-	-	-	-	0.00242159	0	0.0129657	-	-	0.0154367	-	-
Na	0.0899898	3.70429	4.21234	0.12071	0.0665261	0.0577755	0.168945	3.99468	0.215878	3.93417	4.00716	4.02997	3.62434	4.1293	4.14485	0.0889812	0.0961879	0.0744323	0.0956985	0.0761484
K	3.65615	0.0182379	0.0137036	3.59379	3.639	3.63226	3.65958	0.00810568	3.60918	0.00738151	0.00841658	0.00413369	0.0132719	0.00740256	0	4.19016	4.18961	4.04499	4.16962	4.00587
Ba	0.044535	-	-	-	-	-	0.0171274	-	0.0160615	-	-	-	0.00208915	-	-	-	-	-	-	-
Total	19.8642	19.8108	20.1622	19.8063	19.8049	19.7886	19.917	20.0412	19.9038	20.0083	20.0459	20.0581	19.7688	20.1287	20.0807	20.1491	20.1465	20.054	20.164	20.005
Feldspar end-members
Or	97.456	0.489933	0.32424	96.7503	98.2047	98.4343	95.5872	0.202501	94.3562	0.187274	0.209598	0.102469	0.36461	0.178949	0	97.9206	97.7557	97.8266	97.76	98.13
Ab	2.39871	99.5101	99.6677	3.24968	1.79532	1.56572	4.41278	99.7975	5.64379	99.8127	99.7904	99.8975	99.5689	99.8211	99.6882	2.07942	2.24434	1.80012	2.24	1.87
An	0.145337	0	0.0080621	0	0	0	0	0	0	0	0	0	0.0665266	0	0.31184	0	0	0.373332	0	0
*not analysed

## Sheet: Titanite
Mineral composition data for the titanites from the studied syenites
	SS/PVS/2	SS/PVS/2	AP/DVS/1	AP/DVS/1	AP/DVS/1	AP/DVS/1	AP/DVS/1	AP/DVS/1	AP/DVS/1	AP/DVS/1	AP/DVS/1	AP/DVS/1
SiO2	30.9732	32.0334	30.5104	30.4842	30.3644	30.7204	30.4773	30.4529	30.5731	30.3698	30.6071	30.6953
TiO2	30.9684	35.5379	35.4929	35.632	36.381	36.5253	36.3917	36.8199	36.3784	36.2314	36.0575	35.9069
Al2O3	5.9364	2.8352	1.1858	1.2183	1.0282	0.9936	0.9923	1.0023	1.0152	1.0828	1.0978	1.1215
V2O3	0.2381	0.1533	0.236	0.5186	0.4125	0.4711	0.3967	0.2488	0.3674	0.3382	0.3388	0.3093
FeO	1.253	0.3998	2.8066	2.2988	1.5865	1.6834	1.8914	1.461	1.8438	1.9067	2.3793	2.157
MnO	na*	0.0107	0.0455	0.0933	0.1518	0.08	0.0204	0.1275	0.0562	0.0564	0.0568	0.021
MgO	0.0321	0.0207	na*	na*	na*	na*	na*	na*	na*	na*	na*	na*
CaO	28.9614	28.7781	27.2394	26.9095	27.1768	26.6787	26.9544	27.0536	26.6357	26.9864	26.6668	26.8791
Total	98.3626	99.7691	97.5166	97.1547	97.1012	97.1525	97.1242	97.166	96.8698	96.9717	97.2041	97.0901
Cations for 5 oxygen atoms
Si	1.02091	1.0384	1.02529	1.02595	1.02051	1.02989	1.02378	1.02114	1.02815	1.02221	1.02837	1.03134
Ti	0.767733	0.866453	0.897083	0.90195	0.919641	0.920974	0.91944	0.928605	0.920133	0.917221	0.911202	0.907406
Al	0.230597	0.108312	0.0469614	0.0483209	0.0407248	0.0392558	0.0392828	0.0396081	0.0402343	0.0429512	0.0434691	0.044408
V	0.0062918	0.003984	0.00635811	0.0139926	0.0111145	0.0126617	0.0106834	0.00668841	0.00990536	0.00912614	0.00912614	0.0083316
Fe	0.0345345	0.010837	0.0788648	0.0646926	0.0445856	0.0471903	0.0531271	0.0409647	0.051848	0.0536639	0.0668467	0.0606018
Mn	-	-	0.00129494	0.00265932	0.00432078	0.00227138	0.000580361	0.00362081	0.00160063	0.00160774	0.00161627	0.000597572
Mg	0.00157736	0.00100036	-	-	-	-	-	-	-	-	-	-
Ca	1.02268	0.999414	0.980661	0.970237	0.978525	0.958183	0.97002	0.97186	0.959624	0.973115	0.959887	0.967539
Total	3.08432	3.0284	3.03652	3.0278	3.01942	3.01042	3.01691	3.01249	3.01149	3.01989	3.02052	3.02023
*not analysed

## Sheet: Apatite
Mineral composition data for the apatite from the studied syenites
	AP/PVS/1	AP/PVS/1	AP/PVS/1	AP/PVS/1	AP/PVS/1	AP/PVS/1	AP/PVS/1	AP/PVS/1	AP/DVS/1	AP/DVS/1	AP/DVS/1	AP/DVS/1	AP/DVS/1	AP/DVS/1	AP/DVS/1	AP/DVS/1	AP/DVS/1	AP/DVS/1
SiO2	0.4866	0.457	0.9812	1.114	0.6212	0.4104	0.4178	0.4053	0.2853	0.2557	0.2648	0.2524	0.2465	0.4436	0.2902	0.3416	0.4227	0.2345
CaO	53.3565	53.4689	52.4588	52.5692	52.9646	53.5291	53.9239	53.4001	54.0843	54.5428	54.5465	54.6547	54.4441	53.8353	54.1569	54.3213	54.143	54.1934
SrO	na*	na*	na*	na*	na*	na*	na*	na*	na*	na*	na*	na*	na*	na*	na*	0.1551	0.2456	0.2345
FeO	0.3353	0.4324	0.2076	0.1272	0.4019	0.2641	0.2881	0.2679	0.0234	0.0163	na*	na*	0.0288	na*	na*	0.0536	0.0431	0.0231
MnO	0.0647	0.0452	0.1356	0.1097	0.0614	0.0856	0.0631	0.1086	0.042	0.0222	0.0211	na*	na*	0.0316	0.0094	na*	na*	0.019
Na2O	0.0424	0.0604	0.1147	0.0956	0.0988	0.0507	0.0427	0.0425	0.1103	0.1018	0.1114	0.1314	0.1179	0.1297	0.0973	0.132	0.1132	0.0918
P2O5	40.2311	40.4492	39.7589	38.8407	40.0711	40.3051	40.5891	40.4633	40.5806	40.5579	40.66	40.6265	41.1903	39.7162	39.7783	40.3422	40.5969	40.4542
La2O3	0.1711	0.1623	0.3696	0.4355	0.2581	0.158	0.143	0.1469	0.2375	0.1742	0.1752	0.1951	0.1821	0.3464	0.1952	0.2741	0.2747	0.1971
Ce2O3	0.4543	0.4339	0.8895	1.0315	0.6721	0.4188	0.416	0.379	0.518	0.4318	0.4543	0.4344	0.4053	0.6853	0.4274	0.6342	0.6329	0.4485
Pr2O3	0.1451	0.1128	0.2921	0.3483	0.1992	0.1182	0.1229	0.0974	0.1573	0.1275	0.1158	0.1311	0.1109	0.2347	0.1249	0.2683	0.2574	0.1872
Nd2O3	0.332	0.3213	0.6961	0.7909	0.4865	0.2484	0.2591	0.2377	0.2674	0.188	0.2114	0.2126	0.2058	0.3108	0.2028	0.4021	0.4093	0.3251
Sm2O3	0.0709	0.0998	0.1687	0.2452	0.1106	0.0289	0.0534	0.0301	0.0492	0.0509	0.0493	0.0669	0.0331	0.0751	0.0368	0.2303	0.2136	0.1737
Cl	na*	na*	0.0143	0.0231	0.0134	0.0145	0.0105	0.012	0.0249	0.0211	0.0297	0.0217	0.0235	0.0262	0.0189	0.0278	0.0314	0.0259
F	2.7163	2.2288	2.3581	2.7002	3.2125	3.5872	3.376	3.4963	2.7213	2.3372	2.88	2.5427	3.3599	3.0166	2.7628	3.0247	2.6927	2.6406
Total	98.4063	98.272	98.4452	98.4311	99.1714	99.219	99.7056	99.0871	99.1015	98.8274	99.5195	99.2695	100.348	98.8515	98.1009	100.207	100.077	99.2486
Cations for 25 oxygen atoms
Si	0.0818688	0.0769868	0.166012	0.189614	0.104016	0.0683884	0.0692955	0.0675337	0.0476921	0.0428581	0.0440547	0.0421308	0.0405492	0.0746991	0.0490828	0.0568166	0.0703043	0.0392604
Ca	9.61736	9.64991	9.5087	9.58601	9.50118	9.55624	9.58164	9.53252	9.68586	9.79402	9.72216	9.77371	9.59485	9.7121	9.81313	9.67942	9.64748	9.72032
Sr	-	-	-	-	-	-	-	-	-	-	-	-	-	-	-	0.0149574	0.0236845	0.0227636
Fe	0.0471719	0.06091	0.0293705	0.018104	0.0562718	0.0367999	0.0399561	0.0373267	0.00327088	0.00228451	-	-	0.00396151	-	-	0.00745462	0.00599418	0.00323391
Mn	0.00921912	0.00644877	0.0194303	0.0158136	0.00870717	0.0120806	0.00886349	0.0153254	0.00594611	0.00315133	0.002973	-	-	0.00450661	0.00134648	-	-	0.00269404
Na	0.01383	0.0197263	0.0376229	0.0315465	0.0320727	0.0163792	0.0137301	0.0137291	0.0357461	0.0330794	0.0359308	0.042522	0.0376	0.0423421	0.0319046	0.0425637	0.036501	0.0297964
P	5.73012	5.76853	5.69469	5.59663	5.6801	5.68578	5.69903	5.70769	5.74273	5.75483	5.72659	5.74083	5.73609	5.6617	5.69552	5.68031	5.71607	5.73365
La	0.0106168	0.0100836	0.0230626	0.0273381	0.0159387	0.00971019	0.00874718	0.00902737	0.0146421	0.0107683	0.0107499	0.0120106	0.0110477	0.0215128	0.0121761	0.0168136	0.0168501	0.0121701
Ce	0.0279806	0.0267583	0.0550929	0.0642721	0.0411976	0.0255476	0.025258	0.0231181	0.0316988	0.0264943	0.0276685	0.0265441	0.0244068	0.0422448	0.0264627	0.0386146	0.0385348	0.027488
Pr	0.00889399	0.00692296	0.0180051	0.0215984	0.0121518	0.00717589	0.00742628	0.0059127	0.00957981	0.00778565	0.00701884	0.00797252	0.0066463	0.0143986	0.00769622	0.0162578	0.015597	0.0114183
Nd	0.0199474	0.0193291	0.0420584	0.0480736	0.0290906	0.0147818	0.0153463	0.014144	0.0159627	0.0112528	0.0125597	0.0126728	0.0120896	0.0186898	0.012249	0.0238832	0.0243104	0.019437
Sm	0.00411056	0.00579347	0.00983567	0.0143818	0.00638165	0.00165951	0.00305201	0.0017283	0.00283412	0.00293987	0.00282637	0.00384808	0.0018763	0.00435785	0.0021448	0.0131996	0.0122422	0.0100212
Cl	0.000855424	0.00122767	0.00410044	0.00666362	0.00380267	0.00409503	0.00295148	0.00338874	0.00705437	0.00599374	0.00837421	0.0061388	0.0065516	0.0074772	0.00541761	0.00783639	0.00885101	0.00734896
F	1.44511	1.18726	1.26159	1.45331	1.70094	1.8902	1.77058	1.84217	1.43846	1.23872	1.51511	1.34209	1.74771	1.60627	1.4776	1.5908	1.41616	1.39795
Total	17.0171	16.8399	16.8696	17.0734	17.1919	17.3288	17.2459	17.2736	17.0415	16.9342	17.1153	17.0105	17.2232	17.2102	17.1347	17.1889	17.0326	17.0375
*not analysed

## Sheet: Allanite
Mineral composition data for the allanite from the studied syenites
	SS/PVS/1	SS/PVS/1	SS/PVS/1	SS/PVS/1	SS/PVS/1	SS/PVS/1	SS/PVS/1	SS/PVS/2	SS/PVS/2	SS/PVS/2
F	0.0753	0	0.1078	0.2086	na*	na*	na*	0.0962	0.2025	0.3159
Na2O	0.0469	0.0409	0.0377	0.1407	0.0432	0.0463	0.0414	na*	na*	na*
MgO	0.0435	0.027	0.0768	0.1895	0.0328	0.0362	0.0619	0.0948	0.1165	0.1591
Al2O3	16.7746	16.7443	16.9533	16.7943	16.6678	16.8267	16.6831	16.1702	16.9445	15.7492
SiO2	30.6811	30.7947	31.6731	30.3554	30.5732	30.4784	30.5886	30.283	30.2309	27.3451
P2O5	0.0992	0.1099	na*	na*	na*	0.1342	na*	0.0774	0.1448	0.0576
Cl	0.0305	0.0228	na*	0.029	0.0205	0.0448	0.0219	0.018	0.0101	0.0347
CaO	11.0882	10.8558	11.2055	10.5275	10.7859	11.1158	10.9736	10.9689	11.6376	10.5593
TiO2	0.1422	0.3124	0.3492	0.2148	0.2892	0.2903	0.3083	0.2392	0.2419	0.1793
Fe2O3	15.633	16.1592	16.7183	16.2693	16.6244	16.1335	16.6482	15.1313	15.2439	20.9114
Y2O3	na*	0.0268	-0.0043	0.0005	0.0856	0.0441	0.0612	na*	na*	na*
La2O3	4.9448	5.8157	4.743	5.1408	5.7392	5.5298	5.7414	5.7029	6.2663	5.3213
Ce2O3	12.4638	12.2507	10.428	10.8544	10.9624	12.0753	11.1172	11.8847	12.8427	11.2315
Nd2O3	3.7421	4.339	4.2614	4.7226	4.5879	4.2585	4.491	3.5923	3.8639	3.6679
Sm2O3	0.4872	0.7393	0.5982	0.5612	1.0455	0.4313	0.5941	0.6278	0.7346	0.8405
Total	96.2524	98.2385	97.148	96.0086	97.4576	97.4452	97.3319	94.8867	98.4802	96.3728
*not analysed

## Sheet: Magnetite
Mineral composition for the magnetites from the studied syenites
	AP/DVS/1	AP/DVS/1	AP/DVS/1	AP/DVS/1	AP/DVS/1	AP/DVS/1	AP/DVS/1	AP/DVS/1	AP/DVS/3	AP/DVS/3	AP/DVS/3	AP/DVS/3	AP/DVS/3
SiO2	0.026	0.0297	0.0186	0.0057	na*	0.0168	0.0082	na*	na*	na*	na*	na*	na*
TiO2	0.1222	0.1488	0.1405	0.1382	0.1442	0.1181	0.1482	0.189	0.1693	0.1678	0.1476	0.1458	0.1486
Al2O3	0.0943	0.0478	0.0487	0.0583	0.0292	0.0507	0.0634	0.2477	na*	na*	na*	na*	na*
Cr2O3	0.3116	0.0937	0.1979	0.0843	0.1693	0.0463	0.2636	0.1802	0.112	0.1959	0.0651	0.1118	0.082
V2O3	0.2186	0.1376	0.2298	0.2414	0.1143	0.1488	0.0795	0.035	0.1592	0.1932	0.1476	0.2615	0.1449
Fe2O3	67.5343	67.4568	67.5765	67.9126	67.2491	68.5561	67.6591	67.8665	68.6354	68.054	67.8497	67.87	68.0707
FeO	30.905	30.7216	30.7052	30.8414	30.4826	31.0642	30.6192	31.1095	30.8489	30.6659	30.4115	30.5795	30.5441
MnO	0.0798	0.1101	0.2314	0.1708	0.1908	0.1603	0.3118	0.0412	0.2293	0.239	0.259	0.2391	0.2752
MgO	na*	na*	na*	na*	na*	na*	na*	na*	0.0424	0.0297	0.029	0.004	0.0456
CaO	na*	na*	na*	na*	na*	na*	na*	na*	0.1231	0.1134	0.1317	0.1155	0.0765
Total	99.2919	98.7461	99.1486	99.4528	98.3812	100.161	99.1531	99.6691	100.32	99.6589	99.0411	99.3272	99.3876
Cations for 32 oxygen atoms
Si	0.0080645	0.00926656	0.00577933	0.00176579	0.000532486	0.00516811	0.00254779	0	0	0	0	0	0
Ti	0.028508	0.0349186	0.0328346	0.0322006	0.0339717	0.0273253	0.034633	0.0438977	0.0390937	0.0390064	0.0345269	0.0340128	0.0346403
Al	0.0344704	0.017576	0.017833	0.0212844	0.0107789	0.0183807	0.023215	0.0901455	0	0	0	0	0
Cr	0.0764094	0.0231125	0.0486133	0.020646	0.0419239	0.0112603	0.0647501	0.0439934	0.0271845	0.0478665	0.0160068	0.0274145	0.0200923
V	0.0543589	0.0344189	0.0572441	0.0599538	0.0287027	0.036698	0.0198031	0.00866507	0.0391848	0.0478714	0.0368029	0.0650251	0.0360044
Fe3+	15.7616	15.8365	15.7991	15.8302	15.8496	15.8687	15.8179	15.7694	15.8554	15.8262	15.8781	15.8395	15.8746
Fe2+	8.01561	8.01509	7.97772	7.98915	7.98389	7.99073	7.95513	8.03312	7.91958	7.92521	7.90898	7.93098	7.91593
Mn	0.0209626	0.029093	0.0608928	0.0448116	0.0506147	0.0417633	0.0820474	0.0107752	0.0596213	0.0625589	0.068221	0.0628075	0.0722368
Mg	-	-	-	-	-	-	-	-	0.0194066	0.0136846	0.0134463	0.0018496	0.0210698
Ca	-	-	-	-	-	-	-	-	0.0404891	0.037548	0.0438821	0.0383793	0.0254012
Total	24	24	24	24	24	24	24	24	24	24	24	24	24
Note: Separate data for FeO and Fe2O3 are estimated using stoichiometry
*not analysed

## Sheet: Rutile
Mineral chemical data for the rutile in the Peddavaduguru syenite
	SS/PVS/2	SS/PVS/2	SS/PVS/2	SS/PVS/1	SS/PVS/1	SS/PVS/1	SS/PVS/1	SS/PVS/1	SS/PVS/1	SS/PVS/1	SS/PVS/1	SS/PVS/1	SS/PVS/1
TiO2	98.1905	96.3563	96.3101	94.8042	95.731	95.4165	96.7378	97.0205	98.2155	97.6048	97.5662	97.2058	96.9671
Al2O3	0.0685	0.9807	1.2746	na*	na*	na*	na*	na*	na*	na*	na*	na*	na*
V2O3	0.7606	0.8401	1.089	0.7111	0.9279	0.6966	0.9004	0.9113	0.8603	0.8731	0.8214	0.8196	0.8594
FeO	0.8321	0.078	0.1127	2.4992	2.3749	3.1473	2.46	0.9873	0.6349	0.6349	0.3732	2.0974	1.3617
Total	99.8517	98.2551	98.7864	98.0145	99.0338	99.2604	100.098	98.9191	99.7107	99.1128	98.7608	100.123	99.1882
*not analysed
